# Supplementary material for: Plasma Lipopolysaccharide Is Closely Associated With Glycemic Control and Abdominal Obesity: Evidence from bariatric surgery
Source: PubMed Central journal article supplement — Diabetes Care. 2013 Oct 15;36(11):3627–32. doi: 10.2337/dc13-0451 (PMC3816876; doi:10.2337/dc13-0451), 2013-10-15

SUPPLEMENTARY DATA

**Supplemental Figure 1.** Flow chart. Patients with abdominal diameter >50 cm were excluded from attending CT scan due to the diameter of the CT scanner.

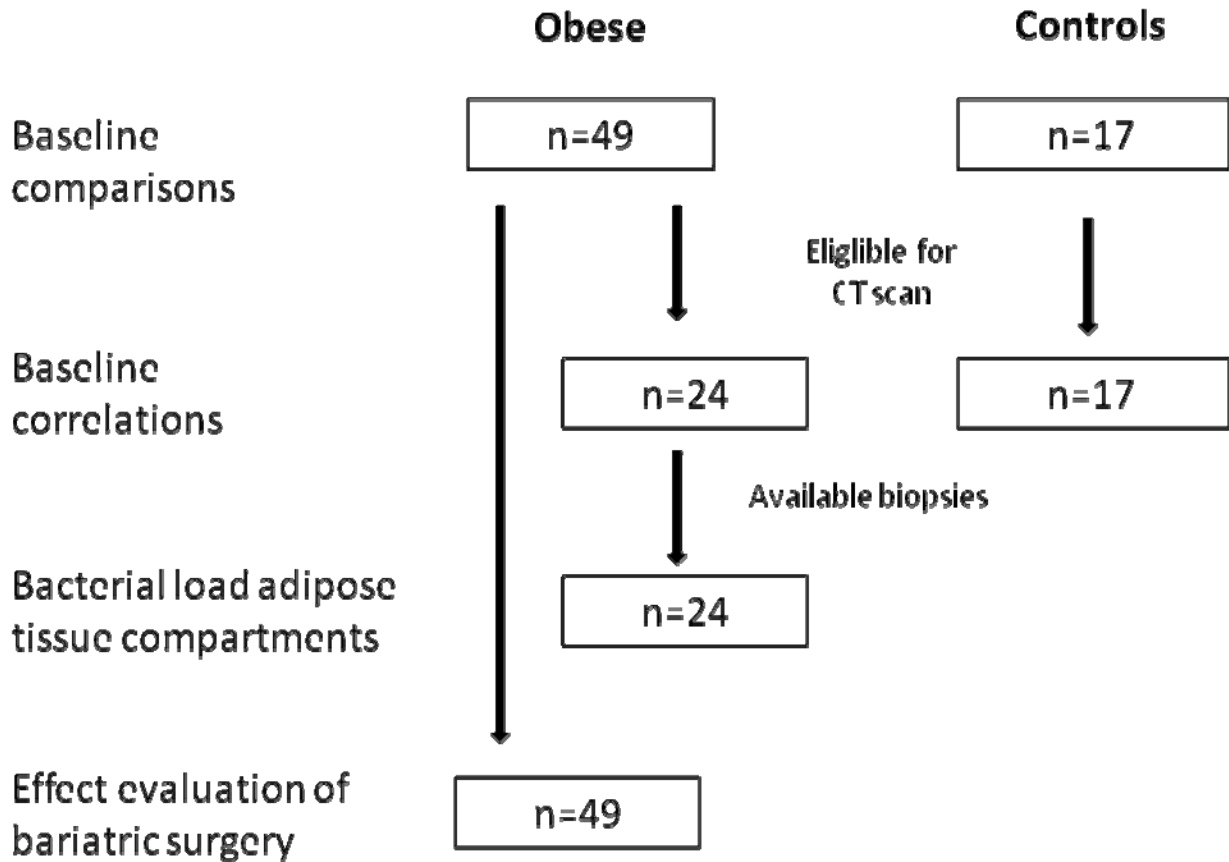

SUPPLEMENTARY DATA

**Supplemental Figure 2.** Plasma levels of LPS in controls (n=17), obese subjects (n=49) at baseline, obese subjects pre-operatively (pre-op) and one year post-operatively (1 y Post-op). Data as medians (25-75 percentiles).

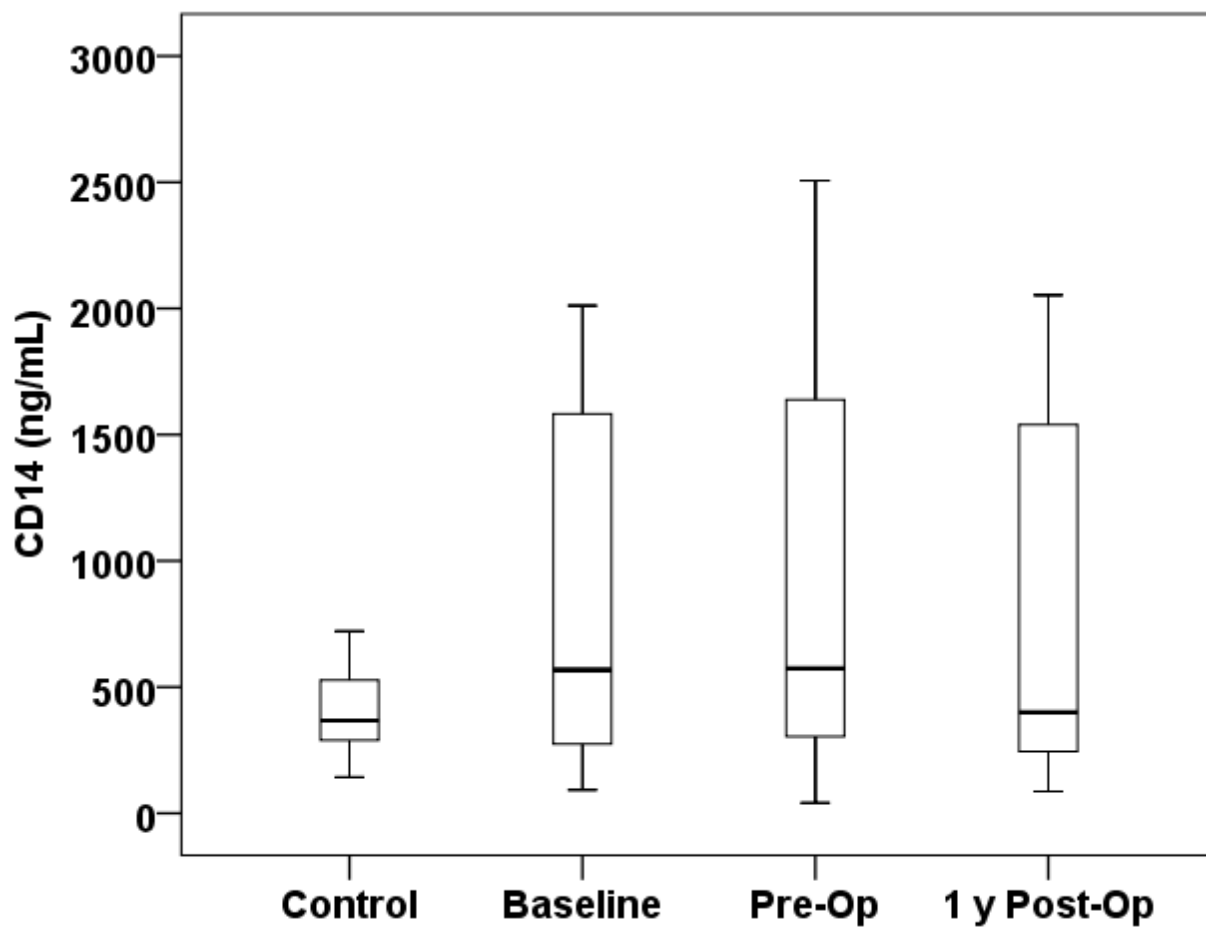

Supplement: supp_dc13-0451v130451_DC130451SupplementaryData.pdf [file supp_dc13-0451v130451_DC130451SupplementaryData.pdf]
